# Supplementary material
Source: MDPI journal article supplement (https://www.mdpi.com/2073-4441/13/23/3478)
Supplement: s1 [file s1]

# Splitting and Length of Years for Improving Tree-Based Models to Predict Reference Crop Evapotranspiration in the Humid Regions of China

Xiaoqiang Liu <sup>1</sup>, Lifeng Wu <sup>2,3,\*</sup>, Fucang Zhang <sup>1,\*</sup>, Guomin Huang <sup>2</sup>, Fulai Yan <sup>1</sup> and Wenqiang Bai <sup>1</sup>

## Supplementary Materials:

**Table S1.** Average statistical values of different input parameters of three length of years of machine learning models in testing process of 21 stations under the fixed test data set (2016-2019).

| Model/Input combination | 10-years       |                               |                              |              | 30-years       |                  |                 |              | 50-years       |                  |                 |              |
|-------------------------|----------------|-------------------------------|------------------------------|--------------|----------------|------------------|-----------------|--------------|----------------|------------------|-----------------|--------------|
|                         | R <sup>2</sup> | RMSE<br>(mm·d <sup>-1</sup> ) | MAE<br>(mm·d <sup>-1</sup> ) | NSE          | R <sup>2</sup> | RMSE<br>(mm·d-1) | MAE<br>(mm·d-1) | NSE          | R <sup>2</sup> | RMSE<br>(mm·d-1) | MAE<br>(mm·d-1) | NSE          |
| XGB                     |                |                               |                              |              |                |                  |                 |              |                |                  |                 |              |
| 1                       | 0.768          | 0.717                         | 0.528                        | 0.725        | 0.775          | 0.696            | 0.514           | 0.775        | 0.775          | 0.703            | 0.520           | 0.737        |
| 2                       | 0.946          | 0.325                         | 0.245                        | 0.942        | 0.948          | 0.320            | 0.237           | 0.948        | 0.947          | 0.323            | 0.239           | 0.942        |
| 3                       | 0.872          | 0.524                         | 0.373                        | 0.851        | 0.874          | 0.525            | 0.376           | 0.874        | 0.870          | 0.549            | 0.395           | 0.838        |
| 4                       | 0.804          | 0.757                         | 0.562                        | 0.682        | 0.812          | 0.708            | 0.522           | 0.812        | 0.814          | 0.699            | 0.513           | 0.734        |
|                         | <b>0.848</b>   | <b>0.581</b>                  | <b>0.427</b>                 | <b>0.800</b> | <b>0.852</b>   | <b>0.563</b>     | <b>0.412</b>    | <b>0.852</b> | <b>0.852</b>   | <b>0.568</b>     | <b>0.417</b>    | <b>0.813</b> |
| RF                      |                |                               |                              |              |                |                  |                 |              |                |                  |                 |              |
| 1                       | 0.778          | 0.700                         | 0.517                        | 0.737        | 0.778          | 0.690            | 0.510           | 0.745        | 0.776          | 0.700            | 0.519           | 0.738        |
| 2                       | 0.950          | 0.315                         | 0.240                        | 0.945        | 0.950          | 0.314            | 0.235           | 0.945        | 0.949          | 0.318            | 0.237           | 0.944        |
| 3                       | 0.881          | 0.504                         | 0.360                        | 0.862        | 0.880          | 0.511            | 0.367           | 0.858        | 0.876          | 0.537            | 0.387           | 0.844        |
| 4                       | 0.816          | 0.719                         | 0.537                        | 0.714        | 0.821          | 0.679            | 0.501           | 0.749        | 0.822          | 0.673            | 0.494           | 0.754        |
|                         | <b>0.856</b>   | <b>0.560</b>                  | <b>0.413</b>                 | <b>0.814</b> | <b>0.857</b>   | <b>0.549</b>     | <b>0.403</b>    | <b>0.824</b> | <b>0.856</b>   | <b>0.557</b>     | <b>0.409</b>    | <b>0.820</b> |

Note: The average of the four combinations of each statistical indicator are highlighted in bold.

**Table S2.** Average statistical values of five proportions of three length of years of machine learning models in testing process of 21 stations under the fixed test data set (2016-2019).

| Model/Proportions | 10-years       |                               |                              |              | 30-years       |                               |                              |              | 50-years       |                               |                              |              |
|-------------------|----------------|-------------------------------|------------------------------|--------------|----------------|-------------------------------|------------------------------|--------------|----------------|-------------------------------|------------------------------|--------------|
|                   | R <sup>2</sup> | RMSE<br>(mm·d <sup>-1</sup> ) | MAE<br>(mm·d <sup>-1</sup> ) | NSE          | R <sup>2</sup> | RMSE<br>(mm·d <sup>-1</sup> ) | MAE<br>(mm·d <sup>-1</sup> ) | NSE          | R <sup>2</sup> | RMSE<br>(mm·d <sup>-1</sup> ) | MAE<br>(mm·d <sup>-1</sup> ) | NSE          |
| XGB               |                |                               |                              |              |                |                               |                              |              |                |                               |                              |              |
| 55                | 0.844          | 0.589                         | 0.435                        | 0.794        | 0.849          | 0.570                         | 0.418                        | 0.810        | 0.849          | 0.575                         | 0.422                        | 0.808        |
| 64                | 0.846          | 0.584                         | 0.430                        | 0.798        | 0.851          | 0.566                         | 0.415                        | 0.813        | 0.850          | 0.571                         | 0.419                        | 0.811        |
| 73                | 0.847          | 0.582                         | 0.428                        | 0.800        | 0.852          | 0.563                         | 0.413                        | 0.815        | 0.851          | 0.569                         | 0.417                        | 0.812        |
| 82                | 0.849          | 0.579                         | 0.425                        | 0.801        | 0.853          | 0.561                         | 0.411                        | 0.816        | 0.852          | 0.567                         | 0.416                        | 0.813        |
| 91                | 0.850          | 0.577                         | 0.424                        | 0.802        | 0.854          | 0.560                         | 0.410                        | 0.817        | 0.853          | 0.566                         | 0.415                        | 0.814        |
|                   | <b>0.848</b>   | <b>0.581</b>                  | <b>0.427</b>                 | <b>0.800</b> | <b>0.852</b>   | <b>0.563</b>                  | <b>0.412</b>                 | <b>0.815</b> | <b>0.852</b>   | <b>0.568</b>                  | <b>0.417</b>                 | <b>0.813</b> |
| RF                |                |                               |                              |              |                |                               |                              |              |                |                               |                              |              |
| 55                | 0.853          | 0.566                         | 0.419                        | 0.810        | 0.855          | 0.554                         | 0.408                        | 0.820        | 0.854          | 0.561                         | 0.413                        | 0.817        |
| 64                | 0.855          | 0.562                         | 0.415                        | 0.813        | 0.856          | 0.551                         | 0.405                        | 0.823        | 0.855          | 0.559                         | 0.411                        | 0.819        |
| 73                | 0.856          | 0.560                         | 0.414                        | 0.814        | 0.857          | 0.549                         | 0.403                        | 0.824        | 0.855          | 0.557                         | 0.410                        | 0.820        |
| 82                | 0.857          | 0.558                         | 0.412                        | 0.815        | 0.858          | 0.548                         | 0.402                        | 0.825        | 0.857          | 0.555                         | 0.408                        | 0.821        |
| 91                | 0.858          | 0.557                         | 0.411                        | 0.816        | 0.858          | 0.547                         | 0.401                        | 0.825        | 0.856          | 0.555                         | 0.408                        | 0.821        |
|                   | <b>0.856</b>   | <b>0.561</b>                  | <b>0.414</b>                 | <b>0.814</b> | <b>0.857</b>   | <b>0.550</b>                  | <b>0.404</b>                 | <b>0.823</b> | <b>0.855</b>   | <b>0.558</b>                  | <b>0.410</b>                 | <b>0.820</b> |

Note: The average of the five proportions of each statistical indicator are highlighted in bold.
